# Supplementary material
Source: PubMed Central journal article supplement (PMC6999789)
Supplement: NIHMS1546027-supplement-1.pdf [file NIHMS1546027-supplement-1.pdf]

## Supplementary Information for

### Evidence of presolar SiC in the Allende *Curious Marie* calcium aluminum rich inclusion.

O. Pravdivtseva<sup>1</sup>, F. L. H. Tissot<sup>2</sup>, N. Dauphas<sup>3</sup>, & S. Amari<sup>1</sup>.

<sup>1</sup>Physics Department and McDonnell Center for the Space Sciences, Washington University,  
Saint Louis, MO 63130, USA

<sup>2</sup>The Isotoparium, Division of Geological and Planetary Sciences, California Institute of  
Technology, Pasadena, CA 91125, USA

<sup>3</sup>Origins Laboratory, Department of the Geophysical Sciences and Enrico Fermi Institute, The  
University of Chicago, Chicago, IL 60637, USA

Correspondence to: [olga@physics.wustl.edu](mailto:olga@physics.wustl.edu)

#### **This PDF file includes:**

Supplementary Figure 1

Supplementary Tables 1–4

**Supplementary Figure 1.** Backscattered electron images of the *Curious Marie* CAI. The region outlined in left panel is shown in greater detail to the right. Fine-grained sodalite and nepheline are widely distributed in this heavily altered CAI with a small amount of grossular and melilite. The large dark circles in panel A result from prior laser ablation analyses. Mineral names: sod = sodalite; nep = nepheline; grs = grossular; mel = melilite.

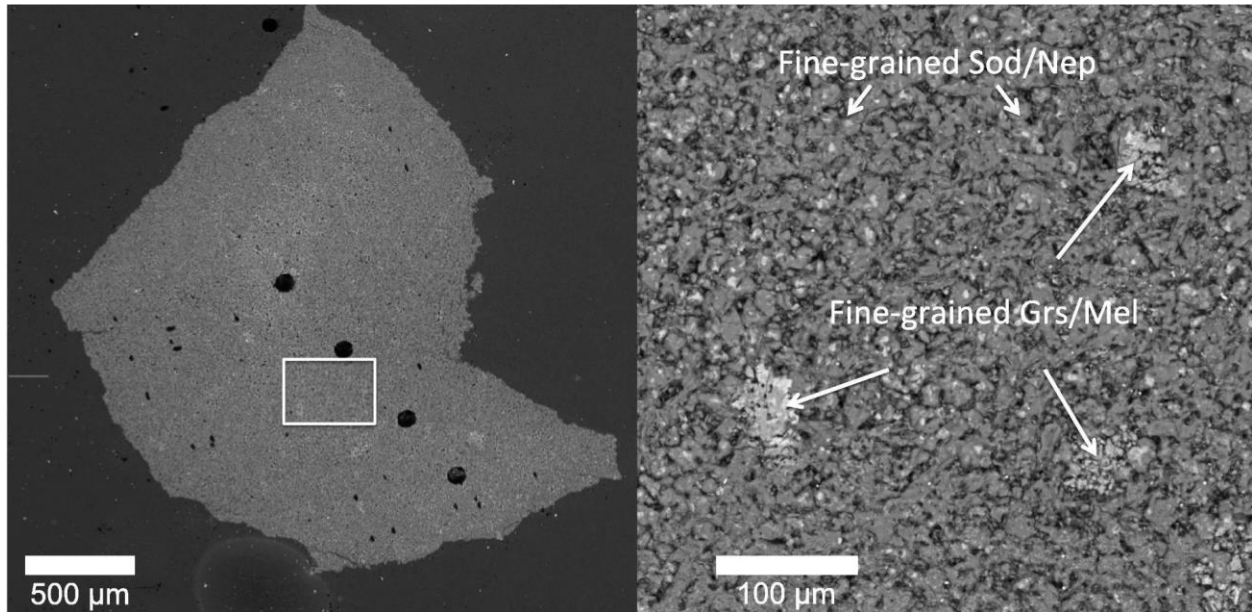

**Supplementary Table 1.** Xenon in the Allende *Curious Marie* CAI. Stated errors are statistical  $1 \sigma$ . Isobaric interferences, blank contributions and instrumental mass discrimination were considered as systematical errors, they were corrected for and correlated error propagated.

| T,<br>°C | $^{132}\text{Xe} \times 10^{-10}$<br>$\text{cm}^3 \text{STP/g}$ | $^{132}\text{Xe} \equiv 100$ |                   |                   |                   |                   |                   |                   |                   |
|----------|-----------------------------------------------------------------|------------------------------|-------------------|-------------------|-------------------|-------------------|-------------------|-------------------|-------------------|
|          |                                                                 | $^{124}\text{Xe}$            | $^{126}\text{Xe}$ | $^{128}\text{Xe}$ | $^{129}\text{Xe}$ | $^{130}\text{Xe}$ | $^{131}\text{Xe}$ | $^{134}\text{Xe}$ | $^{136}\text{Xe}$ |
| 800      | 0.159                                                           | 0.385<br>0.037               | 0.340<br>0.037    | 10.09<br>0.21     | 322.2<br>2.2      | 14.92<br>0.24     | 79.42<br>0.70     | 39.34<br>0.41     | 33.39<br>0.41     |
| 1000     | 0.172                                                           | 0.434<br>0.049               | 0.425<br>0.030    | 9.25<br>0.33      | 1022.7<br>5.3     | 13.48<br>0.19     | 73.27<br>0.54     | 46.11<br>0.50     | 42.56<br>0.44     |
| 1100     | 0.191                                                           | 0.470<br>0.031               | 0.440<br>0.043    | 11.59<br>0.20     | 3979<br>22        | 12.17<br>0.19     | 67.11<br>0.64     | 57.67<br>0.53     | 56.70<br>0.52     |
| 1150     | 0.131                                                           | 0.460<br>0.047               | 0.400<br>0.041    | 27.10<br>0.40     | 17140<br>110      | 13.63<br>0.20     | 64.93<br>0.90     | 61.55<br>0.99     | 60.82<br>0.77     |
| 1200     | 0.119                                                           | 0.423<br>0.043               | 0.602<br>0.058    | 44.65<br>0.69     | 31410<br>200      | 16.79<br>0.43     | 66.34<br>0.61     | 58.91<br>0.74     | 59.88<br>0.79     |
| 1250     | 0.135                                                           | 0.467<br>0.052               | 0.684<br>0.040    | 119.0<br>0.87     | 103700<br>490     | 30.35<br>0.42     | 65.88<br>0.367    | 60.73<br>0.58     | 59.59<br>0.56     |
| 1300     | 0.239                                                           | 0.474<br>0.037               | 0.709<br>0.051    | 57.41<br>0.40     | 46530<br>230      | 21.36<br>0.26     | 69.71<br>0.57     | 54.85<br>0.54     | 52.93<br>0.51     |
| 1350     | 0.096                                                           | 0.546<br>0.050               | 0.634<br>0.066    | 35.90<br>0.41     | 25610<br>160      | 16.17<br>0.33     | 64.15<br>0.93     | 59.31<br>0.57     | 57.81<br>0.90     |
| 1400     | 0.028                                                           | 0.45<br>0.11                 | 0.68<br>0.16      | 44.0<br>1.5       | 30290<br>270      | 14.25<br>0.51     | 62.1<br>1.6       | 67.6<br>1.1       | 69.3<br>1.4       |
| 1450     | 0.009                                                           | 0.49<br>0.20                 | 1.12<br>0.31      | 28.4<br>1.6       | 3841<br>58        | 7.19<br>0.63      | 52.9<br>2.6       | 82.3<br>3.7       | 82.6<br>3.4       |
| 1500     | 0.003                                                           | 1.33<br>0.40                 | 1.23<br>0.47      | 58.5<br>4.3       | 2422<br>70        | 8.0<br>1.3        | 64.3<br>4.0       | 87.6<br>5.1       | 93.9<br>4.8       |
| 1550     | 0.002                                                           | 0.02<br>0.32                 | 0.01<br>0.50      | 91.5<br>5.5       | 1242<br>67        | 5.5<br>1.8        | 53.2<br>4.6       | 68.6<br>4.7       | 76.9<br>5.5       |
| 1600     | 0.002                                                           | 0.25<br>0.31                 | 0.38<br>0.55      | 114.7<br>8.1      | 640<br>43         | 11.3<br>1.3       | 77.5<br>4.6       | 560.0<br>4.4      | 64.5<br>5.1       |
| 1650     | 0.002                                                           | 0.41<br>0.30                 | 0.49<br>0.30      | 79.9<br>6.1       | 569<br>32         | 12.0<br>1.2       | 72.6<br>4.2       | 50.7<br>3.0       | 47.0<br>3.2       |
| 1700     | 0.004                                                           | 0.44<br>0.23                 | 0.52<br>0.32      | 45.5<br>4.1       | 372<br>21         | 13.9<br>2.2       | 66.2<br>5.3       | 47.6<br>3.0       | 40.6<br>2.9       |
| 1770     | 0.013                                                           | 0.36<br>0.11                 | 0.31<br>0.13      | 22.5<br>1.4       | 249.3<br>6.3      | 13.13<br>0.70     | 74.22<br>1.9      | 47.3<br>1.9       | 42.1<br>1.3       |

|               |        |                |                |               |             |                 |               |               |               |
|---------------|--------|----------------|----------------|---------------|-------------|-----------------|---------------|---------------|---------------|
| Total         | 1.306  | 0.455<br>0.015 | 0.535<br>0.016 | 38.52<br>0.17 | 27142<br>93 | 17.101<br>0.096 | 69.12<br>0.24 | 54.62<br>0.21 | 52.76<br>0.20 |
| 1500<br>blank | 0.0004 | -3.0<br>2.0    | 0.2<br>1.1     | 30<br>33      | 140<br>25   | 6.7<br>3.2      | 91<br>14      | 30<br>6       | 28<br>6       |

**Supplementary Table 2.** Krypton in the Allende *Curious Marie* CAI. Stated errors are statistical  $1\sigma$ .

| T, °C | $^{84}\text{Kr} \times 10^{-10}$<br>cm <sup>3</sup> STP/g | $^{84}\text{Kr} \equiv 100$ |                  |                  |                  |                  |
|-------|-----------------------------------------------------------|-----------------------------|------------------|------------------|------------------|------------------|
|       |                                                           | $^{78}\text{Kr}$            | $^{80}\text{Kr}$ | $^{82}\text{Kr}$ | $^{83}\text{Kr}$ | $^{86}\text{Kr}$ |
| 800   | 0.475                                                     | 0.806<br>0.038              | 15.46<br>0.17    | 24.73<br>0.20    | 20.28<br>0.24    | 30.45<br>0.24    |
| 1000  | 0.386                                                     | 0.945<br>0.043              | 239.73<br>0.93   | 110.17<br>0.52   | 21.64<br>0.19    | 30.45<br>0.27    |
| 1100  | 0.125                                                     | 1.412<br>0.078              | 1345.6<br>7.5    | 553.2<br>3.9     | 21.89<br>0.31    | 30.94<br>0.59    |
| 1150  | 0.086                                                     | 1.68<br>0.10                | 927.5<br>9.2     | 380.4<br>4.2     | 21.27<br>0.47    | 30.72<br>0.63    |
| 1200  | 0.094                                                     | 1.69<br>0.12                | 464.3<br>2.6     | 197.1<br>1.6     | 20.33<br>0.35    | 30.43<br>0.45    |
| 1250  | 0.129                                                     | 2.03<br>0.12                | 335.5<br>1.5     | 150.33<br>0.99   | 21.12<br>0.38    | 31.65<br>0.45    |
| 1300  | 0.143                                                     | 1.86<br>0.11                | 66.36<br>0.75    | 43.77<br>0.48    | 21.49<br>0.26    | 31.64<br>0.48    |
| 1350  | 0.093                                                     | 1.555<br>0.088              | 45.24<br>0.49    | 35.07<br>0.33    | 20.32<br>0.37    | 30.95<br>0.53    |
| 1400  | 0.039                                                     | 2.28<br>0.27                | 51.88<br>0.63    | 40.2<br>1.1      | 22.06<br>0.64    | 30.70<br>0.64    |
| 1450  | 0.007                                                     | 6.25<br>0.77                | 41.0<br>1.4      | 33.2<br>2.1      | 24.7<br>1.5      | 28.3<br>1.5      |
| 1500  | 0.003                                                     | 19.0<br>2.0                 | 52.7<br>2.7      | 39.7<br>1.7      | 19.7<br>1.9      | 32.4<br>2.0      |
| 1550  | 0.003                                                     | 2.78<br>0.71                | 49.9<br>2.8      | 35.0<br>2.7      | 20.9<br>1.6      | 34.8<br>2.0      |
| 1600  | 0.005                                                     | 11.9<br>1.3                 | 39.4<br>1.9      | 32.5<br>1.9      | 20.5<br>1.3      | 29.3<br>2.3      |
| 1650  | 0.006                                                     | 5.10<br>0.46                | 22.36<br>0.55    | 17.94<br>0.71    | 22.56<br>0.65    | 31.22<br>0.69    |

|               |       |                |               |                |               |               |
|---------------|-------|----------------|---------------|----------------|---------------|---------------|
| 1700          | 0.010 | 4.21<br>0.46   | 13.20<br>0.63 | 22.8<br>1.0    | 20.1<br>1.4   | 32.0<br>1.5   |
| 1770          | 0.041 | 1.97<br>0.15   | 12.61<br>0.46 | 23.82<br>0.78  | 20.91<br>0.55 | 31.72<br>0.97 |
| Total         | 1.658 | 1.416<br>0.025 | 272.5<br>1.2  | 123.43<br>0.52 | 21.04<br>0.10 | 30.79<br>0.13 |
| 1500<br>blank | 0.002 | 1.0<br>2.0     | 3.5<br>1.2    | 26.0<br>1.4    | 21.8<br>0.8   | 32.4<br>1.5   |

**Supplementary Table 3.** Neon in the Allende *Curious Marie* CAI after correction for blank. Stated errors are statistical  $1 \sigma$ . Ne isotopic composition above 1450°C was consistent with the 1200°C, 1500°C and 1780°C procedural blanks. The 1780°C blank was subtracted from all temperature steps resulting in a slight overcorrection (negative  $^{20}\text{Ne}$  concentrations in Table 3) for the extractions above 1450°C.

| T, °C       | $^{20}\text{Ne} \times 10^{-10}$<br>$\text{cm}^3 \text{STP/g}$ | $^{20}\text{Ne} \equiv 100$ |                  |
|-------------|----------------------------------------------------------------|-----------------------------|------------------|
|             |                                                                | $^{21}\text{Ne}$            | $^{22}\text{Ne}$ |
| <b>800</b>  | 73.58                                                          | 118.60<br>0.19              | 208.89<br>0.33   |
| <b>1000</b> | 11.25                                                          | 85.83<br>0.44               | 140.94<br>0.52   |
| <b>1100</b> | 6.56                                                           | 89.23<br>0.55               | 140.1<br>1.3     |
| <b>1150</b> | 5.18                                                           | 93.60<br>0.63               | 138.1<br>1.2     |
| <b>1200</b> | 4.32                                                           | 106.07<br>0.72              | 151.6<br>1.2     |
| <b>1250</b> | 4.54                                                           | 112.46<br>0.79              | 162.4<br>1.3     |
| <b>1300</b> | 6.44                                                           | 107.06<br>0.48              | 160.52<br>0.93   |
| <b>1350</b> | 3.76                                                           | 124.23<br>0.84              | 190.7<br>1.6     |
| <b>1400</b> | 4.00                                                           | 118.60<br>0.92              | 183.1<br>1.5     |
| <b>1450</b> | 2.05                                                           | 131.3<br>1.5                | 208.4<br>2.9     |

|                 |       |                |                |
|-----------------|-------|----------------|----------------|
| 1500            | -0.12 | 22<br>10       | 35<br>11       |
| 1550            | -0.53 | 5.9<br>1.0     | 5.1<br>7.0     |
| 1600            | -0.20 | 5.3<br>3.4     | 12<br>19       |
| 1650            | -0.26 | 8.3<br>2.6     | 12<br>14       |
| 1700            | -0.28 | 11.3<br>2.3    | 13<br>13       |
| 1770            | 3.0   | 9.29<br>0.37   | 12.3<br>1.3    |
| Total           | 123.0 | 110.31<br>0.17 | 184.39<br>0.30 |
| 1500<br>(blank) | 2.2   | 8.60<br>0.21   | 12.0<br>1.2    |

Only temperature steps shown in bold were used in the calculations and are shown in Figure 3.

**Supplementary Table 4.** Ar in the Allende *Curious Marie* CAI. Stated errors are statistical 1  $\sigma$ .

| T, °C | $^{20}\text{Ne} \times 10^{-8}$<br>cm <sup>3</sup> STP/g | $^{36}\text{Ar} \equiv 1$ |                  |
|-------|----------------------------------------------------------|---------------------------|------------------|
|       |                                                          | $^{38}\text{Ar}$          | $^{40}\text{Ar}$ |
| 800   | 4726                                                     | 0.0830<br>0.0041          | 9762<br>148      |
| 1000  | 13073                                                    | 0.0199<br>0.0004          | 2699<br>13       |
| 1100  | 211                                                      | 0.1064<br>0.0003          | 2412<br>13       |
| 1150  | 132                                                      | 0.1428<br>0.0005          | 2384<br>6        |
| 1200  | 60                                                       | 0.1373<br>0.0019          | 1286<br>7        |
| 1250  | 31                                                       | 0.3855<br>0.0039          | 1549<br>11       |
| 1300  | 39                                                       | 0.3459<br>0.0042          | 981<br>7         |

|               |       |                  |              |
|---------------|-------|------------------|--------------|
| 1350          | 17    | 0.3097<br>0.0049 | 1323<br>16   |
| 1400          | 4.5   | 0.3821<br>0.0110 | 1083<br>18   |
| 1450          | 3.6   | 0.5301<br>0.0144 | 245.7<br>4.8 |
| 1500          | 3.3   | 0.3512<br>0.0057 | 249.7<br>2.6 |
| 1550          | 3.5   | 0.2494<br>0.0038 | 266.2<br>2.4 |
| 1600          | 4.3   | 0.1969<br>0.0029 | 268.9<br>1.9 |
| 1650          | 4.7   | 0.2000<br>0.0028 | 270.3<br>1.6 |
| 1700          | 5.5   | 0.2025<br>0.0028 | 271.4<br>1.8 |
| 1770          | 14    | 0.2071<br>0.0020 | 280.2<br>1.6 |
| <hr/>         |       |                  |              |
| 1500<br>blank | 485   | 0.2223<br>0.0034 | 272.2<br>2.2 |
| <hr/>         |       |                  |              |
| Total         | 18332 | 0.1716<br>0.0068 | 982.7<br>2.8 |
| <hr/>         |       |                  |              |
